# Supplementary material for: New genicular joint angle criteria for flexor muscle (Musculus Semimembranosus) during the terrestrial mammals walking
Source: PeerJ. 2023 May 16;11:e15379. doi: 10.7717/peerj.15379 (PMC10198156; doi:10.7717/peerj.15379)
Supplement: Supplemental Information 1 — Every angle measured at the position shown on Fig. 1. The average from this raw data was used in this study as the angles of each animal. [file peerj-11-15379-s001.xlsx]

## Sheet: supplementary file
Super Order	Order	Family	Genus	Species	SI-1	SI-2	SI-3	SI-4	SI-5	SI-6	SI-7	SI-8	SI-9	SI-10	SI-11	SI-12	SI-13	average
Afrotheria	Proboscidea	Elephantidae	Elephas	maximus	121.4	128.8	124.7	120	124.2	122.7	117.4	120.4	120.5	117.9	120.1	119.8	120.9	120.71
Afrotheria	Proboscidea	Elephantidae	Elephas	maximus	118.1	123.1	121.4	123.3	124.3	120.8	120	122.4	121.6	123.5	125.9	121.3	119.5
Afrotheria	Proboscidea	Elephantidae	Elephas	maximus	125.2	125.6	126.2	123.1	119.9	115.6	116.4	115.6	116.2	116.1	113.4	116.4	114
Laurasiatheria	Artiodactyla	Giraffidae	Giraffa	camelopardalis	94.5	88.5	93.4	89.5	93.1	98.3	97.5	96.6	94.1	89.6	88.4	93	91.8	92.8513
Laurasiatheria	Artiodactyla	Giraffidae	Giraffa	camelopardalis	104.6	103.2	96.6	100.6	98.2	97.2	93.5	91.3	85.9	86.3	92.9	88.7	88.1
Laurasiatheria	Artiodactyla	Giraffidae	Giraffa	camelopardalis	100.1	98.5	95.4	94.7	91.5	89.3	90.4	89.9	90.9	86	87	87.8	84.3
Laurasiatheria	Artiodactyla	Cervidae	Cervus	nippon	85.36	87.43	89.54	89.15	87.84	86.08	87.45	85.45	90.38	92.59	93.7	90.39	93.9	90.2403
Laurasiatheria	Artiodactyla	Cervidae	Cervus	nippon	96.02	97.59	98.94	93.97	88.35	92.13	90.57	91.38	88.78	86.85	88.71	90.73	92.12
Laurasiatheria	Artiodactyla	Cervidae	Cervus	nippon	97.93	93.44	90.17	88.95	92.43	95.21	89.01	86.82	83.4	82.47	84.2	86.78	93.16
Laurasiatheria	Artiodactyla	Cervidae	Rangifer	tarandus	85.96	87.51	91.53	89.76	90.33	95.3	92.01	88.38	86.41	84.06	82.02	84.05	88.39	90.7044
Laurasiatheria	Artiodactyla	Cervidae	Rangifer	tarandus	99.39	94.58	93.54	91.66	89.64	87.26	89.94	87.46	89.05	84.07	83.38	81.19	87.43
Laurasiatheria	Artiodactyla	Cervidae	Rangifer	tarandus	93.69	96.36	94.04	96.77	96.58	92.58	91.63	87.83	94.05	90.87	98.21	98.93	101.63
Laurasiatheria	Artiodactyla	Bovidae	Capra	hircus	108.54	97.06	94.1	104.1	101.43	96.89	96.3	99.99	97.49	101.7	98.39	100.56	99.34	101.708
Laurasiatheria	Artiodactyla	Bovidae	Capra	hircus	108.87	101.27	98.97	99.23	95.78	97.67	94.93	96.61	92.77	97.2	103.47	107.07	106.6
Laurasiatheria	Artiodactyla	Bovidae	Capra	hircus	109.04	104.77	105.43	109.97	109.31	103.97	99.76	104.82	98.58	106.12	103.99	108.2	106.31
Laurasiatheria	Artiodactyla	Bovidae	Ammotragus	lervia	117.37	113.33	108.75	104.27	104.23	101.19	101.01	98.59	98.46	97.3	100.36	99.79	100.76	103.466
Laurasiatheria	Artiodactyla	Bovidae	Ammotragus	lervia	111.94	107.42	104.82	100.01	99.89	96.4	99.79	96.01	97.55	101.16	97.17	95.29	95.77
Laurasiatheria	Artiodactyla	Bovidae	Ammotragus	lervia	113.16	111.28	109.82	109.91	110.36	109.71	109.32	105.61	102.67	100.9	99.42	102.42	101.95
Laurasiatheria	Perissodactyla	Equidae	Equus	cabullus	104.7	104.1	102.6	101.3	101	100	100.2	99.4	98.6	97.6	96.6	95.4	97.3	95.5333
Laurasiatheria	Perissodactyla	Equidae	Equus	cabullus	99.8	96.6	96.7	92.9	92.5	91.8	90.3	91.7	91.1	89.7	88.8	90	89.9
Laurasiatheria	Perissodactyla	Equidae	Equus	cabullus	101.8	98.4	99.3	96.3	95.1	94.1	96.4	94.9	87.9	87.9	90.7	92	90.4
Laurasiatheria	Perissodactyla	Tapiridae	Tapirus	terrestris	112.7	109.81	104.32	106.3	109.42	106.54	106.06	108.98	106.24	98.99	99.64	101	104.32	104.879
Laurasiatheria	Perissodactyla	Tapiridae	Tapirus	terrestris	104.1	101.58	100.4	101.61	101.44	103.72	100.25	97.04	97.46	98.64	94.53	94.55	97.97
Laurasiatheria	Perissodactyla	Tapiridae	Tapirus	terrestris	112.99	106.69	106.09	110	107.91	108.49	107.16	109.38	110.89	108.82	111.77	110.43	112.05
Laurasiatheria	Perissodactyla	Rhinocerotidae	Diceros	bicornis	109.16	108.45	107.19	103.56	102.37	104.53	95.14	99.87	88.07	88.84	86.25	89.12	87.11	100.172
Laurasiatheria	Perissodactyla	Rhinocerotidae	Diceros	bicornis	110.48	113.26	111.37	112.24	115.46	114.75	111.7	107.11	103.67	103.41	98.39	93.08	92.88
Laurasiatheria	Perissodactyla	Rhinocerotidae	Diceros	bicornis	110.44	107.89	100.98	100.09	93.23	95.24	88.88	93.01	94.54	90.58	88.63	91.22	94.53
Laurasiatheria	Carnivora	Canidae	Chrysocyon	brachyurus	112	110.38	105.66	105.68	106.99	105.6	105.09	107.73	106.57	108.97	108.66	112.8	111.02	108.393
Laurasiatheria	Carnivora	Canidae	Chrysocyon	brachyurus	113.7	110.59	111.24	113.62	110.31	108.34	110.53	110.2	110.47	113.71	109.12	115.43	120.63
Laurasiatheria	Carnivora	Canidae	Chrysocyon	brachyurus	110.16	110.42	104.25	101.46	103.52	93.42	99.74	102.84	102.99	100.71	104.9	111.13	116.74
Laurasiatheria	Carnivora	Canidae	Canis	lupus	116.14	111.36	110.92	104.25	104.69	105.47	103.81	100.26	104.28	99.35	101.56	102.36	108.41	106.425
Laurasiatheria	Carnivora	Canidae	Canis	lupus	118.63	107.34	111.42	111.64	109.54	113.79	113.38	110.53	109.27	107.24	101.35	99.99	105.93
Laurasiatheria	Carnivora	Canidae	Canis	lupus	113.86	109.02	101.5	102.84	102.09	98.91	97.91	105.68	107.97	102.44	102.08	107.56	105.82
Laurasiatheria	Carnivora	Felidae	Panthera	leo	99.6	98.5	99.3	99.9	98.1	98.6	99.9	100.7	99.5	99.6	97.4	101.1	106.7	99.1077
Laurasiatheria	Carnivora	Felidae	Panthera	leo	102.9	97.8	100.7	100.8	97.5	96.4	96.3	96.9	97.9	96.6	93.9	97.7	100.9
Laurasiatheria	Carnivora	Felidae	Panthera	leo	104.7	102.6	97.4	99	98	98	97.1	98.7	100.1	98.5	98.6	97.4	99.9
Laurasiatheria	Carnivora	Felidae	Felis	catus	95.62	98.87	95.61	97.53	95.85	92.31	91.58	90.96	95.64	94.75	97.71	96.62	95.94	93.0808
Laurasiatheria	Carnivora	Felidae	Felis	catus	87.16	89.58	85.88	85.72	87.5	94.22	94.42	92.28	95.08	95.87	93.34	92.97	94.79
Laurasiatheria	Carnivora	Felidae	Felis	catus	104	92.23	87.13	92.44	85.38	90.72	90.54	89.11	90.87	92.49	95.93	97.14	94.37
Laurasiatheria	Carnivora	Ursidae	Ursus	thibetanus	119.17	114.65	108.14	109.6	107.42	106.05	106.58	106.05	104.4	103.58	104.39	103.62	106	109.861
Laurasiatheria	Carnivora	Ursidae	Ursus	thibetanus	129.29	123.14	119.5	117.71	117.49	112.32	106.9	105.26	97.29	99.23	93.83	93.35	82.25
Laurasiatheria	Carnivora	Ursidae	Ursus	thibetanus	123.41	124.53	123.69	122.27	114.97	111.84	112.35	112.84	113.69	111.89	107.43	104.18	104.29
Laurasiatheria	Carnivora	Ursidae	Helarctos	malayanus	129.2	127.56	116.79	110.07	113.22	106.41	109.57	113.09	110.19	112.34	115.08	115.36	120.3	115.376
Laurasiatheria	Carnivora	Ursidae	Helarctos	malayanus	122.65	116.92	114.94	108.63	109.02	101.16	103.17	106.05	100.12	105.34	108.54	110.21	118.11
Laurasiatheria	Carnivora	Ursidae	Helarctos	malayanus	123.09	121.72	124.58	119.9	121.32	118.72	118.93	120.64	120.79	122.03	118.91	120.96	124.03
Laurasiatheria	Carnivora	Herpestidae	Suricata	suricatta	84.06	81.17	77.72	77.44	77.01	72.9	71.22	69.95	69.68	73.26	68.97	68.4	63.95	72.9764
Laurasiatheria	Carnivora	Herpestidae	Suricata	suricatta	92.37	90.02	88.76	83.96	79.41	71.92	75.05	72.58	70.88	67.39	65.65	63.75	62.05
Laurasiatheria	Carnivora	Herpestidae	Suricata	suricatta	74.18	74.75	72.24	70.56	69.98	69.06	73.14	70.47	65.8	59.96	66.64	67.8	71.98
Euarchontoglires	Rodentia	Cavidae	Dolichotis	patagonum	85.7	85.4	80.44	85.74	81.16	78.31	76.14	75.4	73.65	74.68	79.75	79.3	78.65	84.5213
Euarchontoglires	Rodentia	Cavidae	Dolichotis	patagonum	98.21	94.21	89.4	87.59	88.59	89.21	86.75	90.4	87.41	89.77	89.35	89.23	89.84
Euarchontoglires	Rodentia	Cavidae	Dolichotis	patagonum	99.54	92.64	92.8	91.9	88.06	84.3	85.73	81.75	77.45	76.48	72.86	73.56	74.98
Euarchontoglires	Primates	Ceropithecidae	Macaca	fuscata	107.65	107.97	101.19	100.8	95.57	102.74	102.51	102.65	103.91	109.66	113.77	108.47	105.68	105.883
Euarchontoglires	Primates	Ceropithecidae	Macaca	fuscata	113.6	109.76	109.97	107.46	115.74	112.81	97.66	106.31	105.85	102.91	104.52	107.21	111.22
Euarchontoglires	Primates	Ceropithecidae	Macaca	fuscata	121.68	114.74	113.76	106.36	100.4	104.59	104.4	104.07	96.37	98.75	97.39	101.46	97.88
Euarchontoglires	Primates	Ceropithecidae	Cercopithecus	neglectus	116.07	108.16	99.48	96.35	94.82	91.06	91.7	89.78	90.58	89.95	89.87	87.96	91.33	100.511
Euarchontoglires	Primates	Ceropithecidae	Cercopithecus	neglectus	115.12	108.84	104.89	102.4	104.56	102.34	99.79	100.12	103.38	101.5	101.87	105.66	104.98
Euarchontoglires	Primates	Ceropithecidae	Cercopithecus	neglectus	115.63	108.21	103.96	101.76	102.68	99.75	104.92	96.82	101.67	99.66	98.81	95.34	98.15
Euarchontoglires	Primates	Ceropithecidae	Chlorocebus	aethiops	103.91	93.55	92.08	93.33	95.62	94.46	91.76	91.87	92.94	94.42	94.42	97.97	100.32	103.857
Euarchontoglires	Primates	Ceropithecidae	Chlorocebus	aethiops	107.29	100.43	99.21	98.29	100.68	103.56	99.49	99.65	98.62	105.64	104.26	112.17	111.49
Euarchontoglires	Primates	Ceropithecidae	Chlorocebus	aethiops	119.77	114.71	110.42	108.27	110.96	114.26	113.73	111.76	109.59	107.51	111.82	116.33	123.86
Marspialia	Diprotodontia	Macropodidae	Macropus	giganteus	111.24	105.66	100.44	95.01	89.12	86.15	89.59	87.73	85.57	90.25	89.43	95.47	89.23	93.7151
Marspialia	Diprotodontia	Macropodidae	Macropus	giganteus	113.57	115.05	113.15	92.94	87.25	79.32	76.82	76.61	81.06	86.23	86.42	98.24	94.93
Marspialia	Diprotodontia	Macropodidae	Macropus	giganteus	115.27	119.98	113.44	110.2	103.25	91.75	85.92	81.19	79.89	86.17	83.37	83.82	84.16
